# Supplementary material
Source: PubMed Central journal article supplement (PMC5527970)
Supplement: NIHMS879337-supplement-supplement_1.pdf [file NIHMS879337-supplement-supplement_1.pdf]

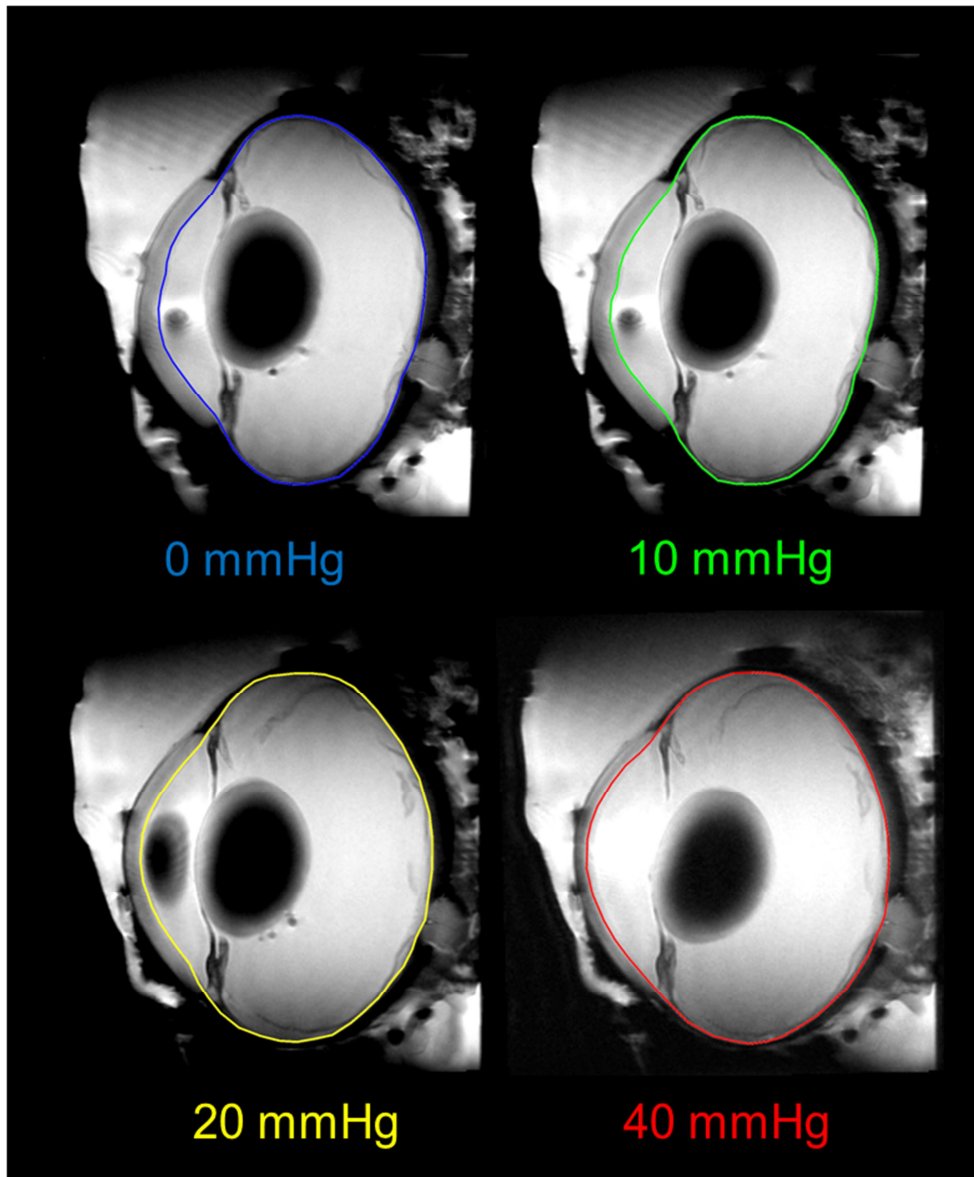

697

698 **Figure S1.** Delineations of the globe periphery shown on the original images for the  
699 data presented in Figure 5A.

700

701

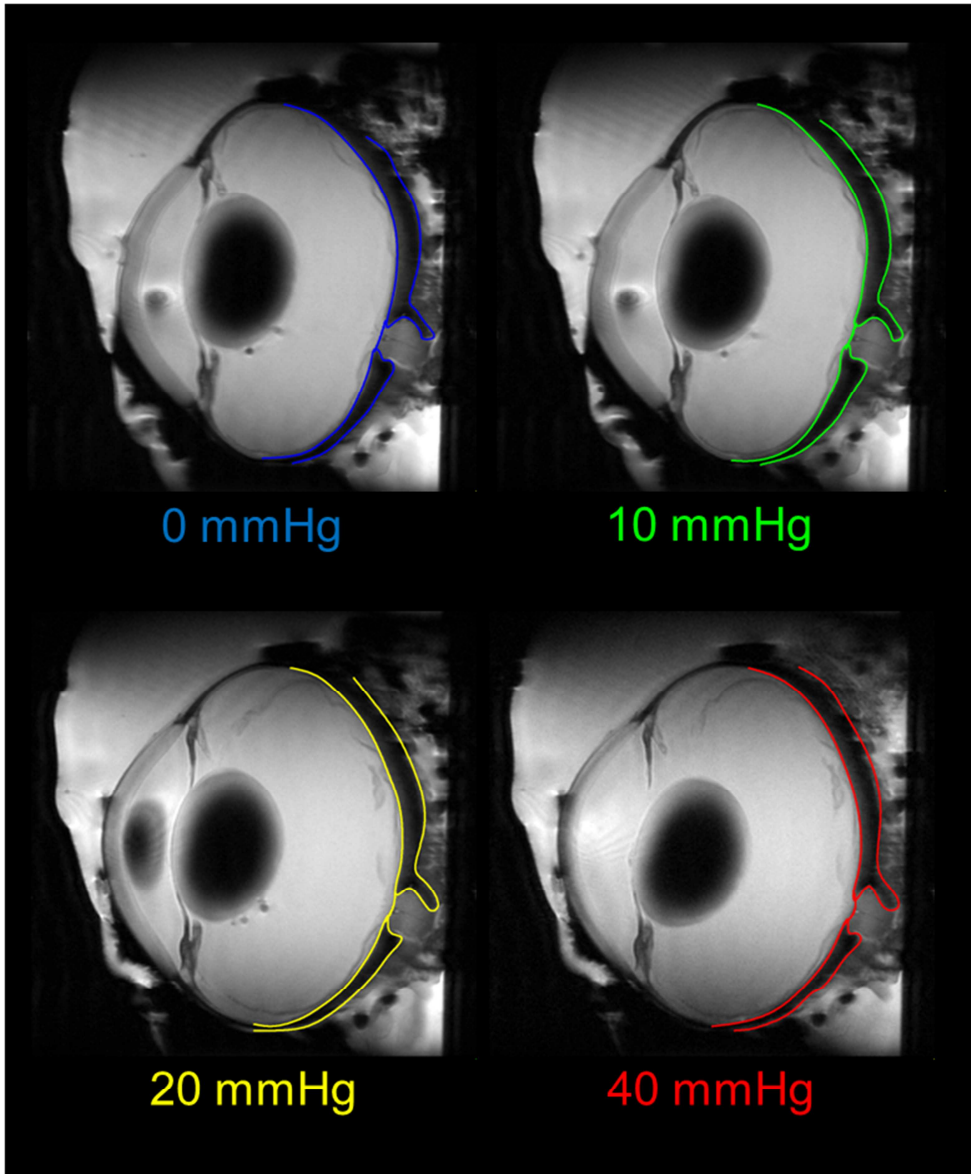

702

703 **Figure S2.** Delineations of the posterior sclera and optic nerve shown on the original  
704 images for the data presented in Figure 7A.

705

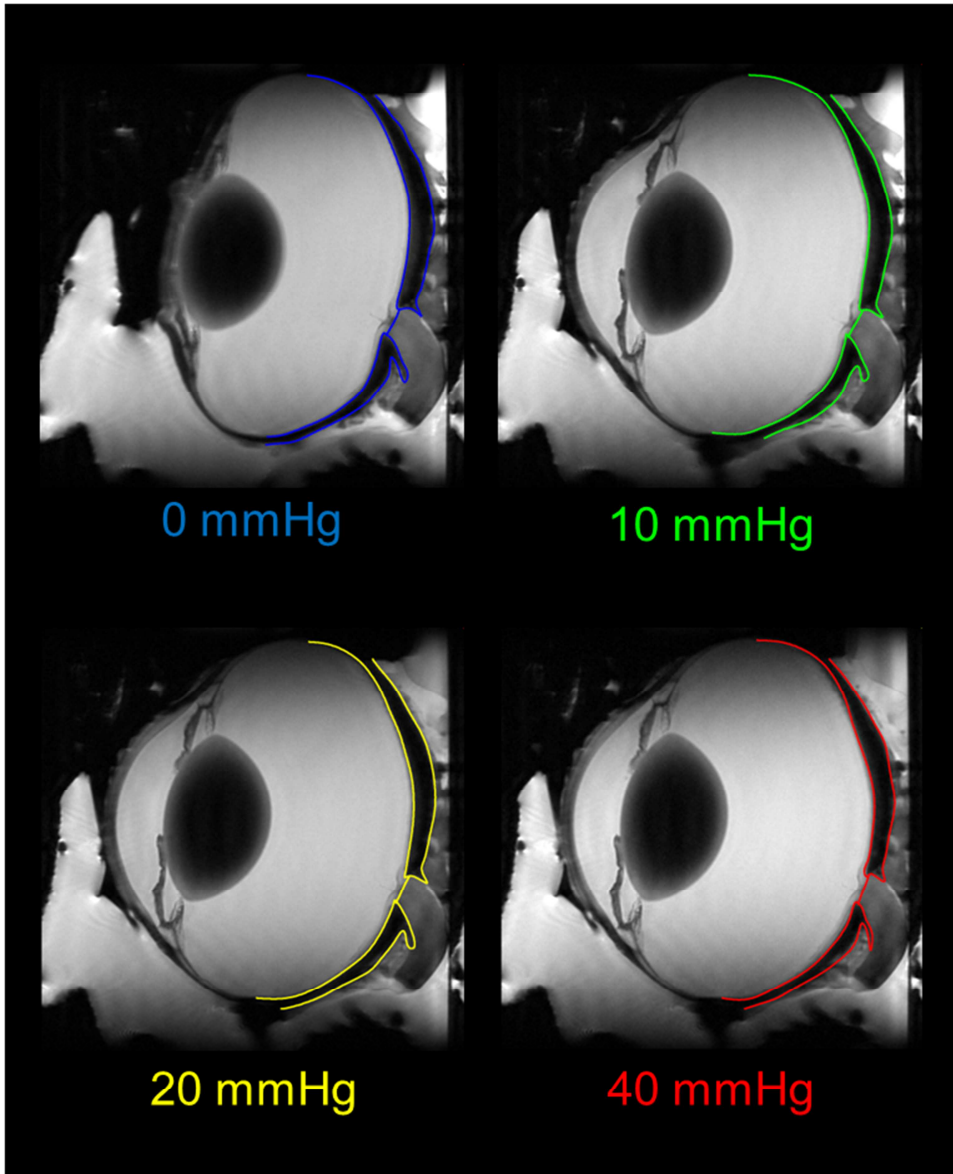

706

707 **Figure S3.** Delineations of the posterior sclera and optic nerve shown on the original  
708 images for the data presented in Figure 7B.

709
